# Supplementary material for: Long-Chain Acyl Coenzyme A Dehydrogenase, a Key Player in Metabolic Rewiring/Invasiveness in Experimental Tumors and Human Mesothelioma Cell Lines
Source: MDPI journal article supplement (doi:10.3390/cancers15113044), 2023-06-03
Supplement: s1 [file s1]

**Supplementary Table S1.** Primers for gene expression analysis.

| Gene     | Forward sequence         | Reverse sequence          |
|----------|--------------------------|---------------------------|
| ACADL    | TGCAATAGCAATGACAGAGCC    | CGCAACTACAATCACAACATCAC   |
| ALDH7A1  | ATGGCAAGCCCTATGTCATCT    | CCGTGGTACTTATCAGCCCA      |
| ATP5H    | GCTGGGCGAAAACCTTGCTCTA   | CCAGTCGATAGCTGGTGGATT     |
| ATPO     | ATTGAAGGTCGCTATGCCACA    | GCTTTTCACTTTAATGGAACGCT   |
| BCAT2    | CGCTCCTGTTTCGTCATTCTCT   | CCCACCTAACTTGTAGTTGCC     |
| MTCO2    | ACAGATGCAATTCCCGGACGTCTA | GGCATGAAACTGTGGTTTGCTCCA  |
| COX5B    | TGTGAAGAGGACAATACCAGCG   | CCAGCTTGTAATGGGCTCCAC     |
| COX6C2   | TGTTGGCTGCTGCGTCACATTC   | CAGAATCTTCCAGGTCCTCGCTCC  |
| TUFM     | GGGGCTAAGTTCAAGAAGTACG   | CACATGAGCCGCATTGATGG      |
| HSD17B10 | TGGCGGTAATAACCGGAGGA     | ACAGTTGACAGCTACATCCACA    |
| IDH3A    | CCCGCGTGGATCTCTAAGG      | AATTTCTGGGCCAATACCATCTC   |
| IDH3B    | GAGCCAAGTCTCAGCGGATT     | GGGCATCACAAGCACATCAAA     |
| AK2      | GCAGAACCCGAGTATCCTAAAGG  | TTCCCAGCATCCATAGTTGCC     |
| MDH2     | TCGGCCCAGAACAAATGCTAAA   | GCGGCTTTGGTCTCGATGT       |
| MYG1     | ACAATGGCACCTTCCACTGCGA   | ACCACGATGTCACAGGAAGCGA    |
| OAT      | TGGACCATTTATGCCGGGATT    | GCTTCACCCTGAATTGGTTCT     |
| PHB      | GACCACGTAATGTGCCAGTCA    | CATCATAGTCCTCTCCGATGCT    |
| PHB2     | GTGCGCGAATCTGTGTTTAC     | GATAATGGGGTACTGGAACCAAG   |
| SSBP1    | TGAGTCCGAAACAACCTACCAGT  | CCTGATCGCCACATCTCATTAG    |
| TRAP1    | AGGACGACTGTTTCAGCACG     | CCGGGCAACAATGTCCAAAAG     |
| ACADS    | GATGGCAAATGTAGACCCTACC   | AAGGCCCCGGAGTATCACGA      |
| ACO2     | GAGCGAGGCAAGTCGTACC      | GGCTTCAATCAGATGGTCACAG    |
| CS       | TGCTTCCTCCACGAATTTGAAA   | CCACCATACATCATGTCCACAG    |
| DECR1    | TCTTCAAAAAGCGATGCTACCA   | CTATCACGCACTGAGCACCT      |
| GSTP1    | CCCTACACCGTGGTCTATTTCC   | CAGGAGGCTTTGAGTGAGC       |
| HCDH     | ATATGCCGCAATTTTACAGGGT   | ACCTGCAATAAAGCAGCCTGG     |
| IVD      | GCTGACCTGTTGAGTGAGGC     | TCGGTGAGCGTCTTGGTCTTA     |
| MGST1    | ATGACAGAGTAGAACGTGTACGC  | TACAGGAGGCCAATTCCAAGA     |
| DLST     | GAAGTGGCCTCTAGGGAGAC     | AACCTTCCTGCTGTTAGGGTA     |
| PRDX3    | GGCCTGTCTGAGTGTTAATGATG  | GGAGCCGAACCTTGCCTTC       |
| RMDN3    | CCAGCGATGGAAACGGACC      | GGGATCTGAAGTCTGCGTATAGT   |
| S100A10  | GGCTACTTAACAAAGGAGGACC   | GAGGCCCCGAATTAGGGAAA      |
| SUOX     | ACTCAAGTCAATCCCCTCAAGG   | GCTGGAGTTATCACCAGAGAAGG   |
| MPST     | CGCCGTGTCACTGCTTGAT      | CAGGTTCAATGCCGTCTCG       |
| TST      | ACTTCACCAGACCAAGGAGAT    | CCGACAGCATTTCCACAATTTT    |
| TIMM9    | AGAGACCTGCTTTTTGGACTGTG  | CCTGAAATCTCATGGATATTCTTTG |
